# Supplementary material
Source: Springer Nature journal article supplement (https://www.springermedizin.de/resource/supplementary/12959_2010_140_MOESM9_ESM.pdf/9569698)

**Fig 6**

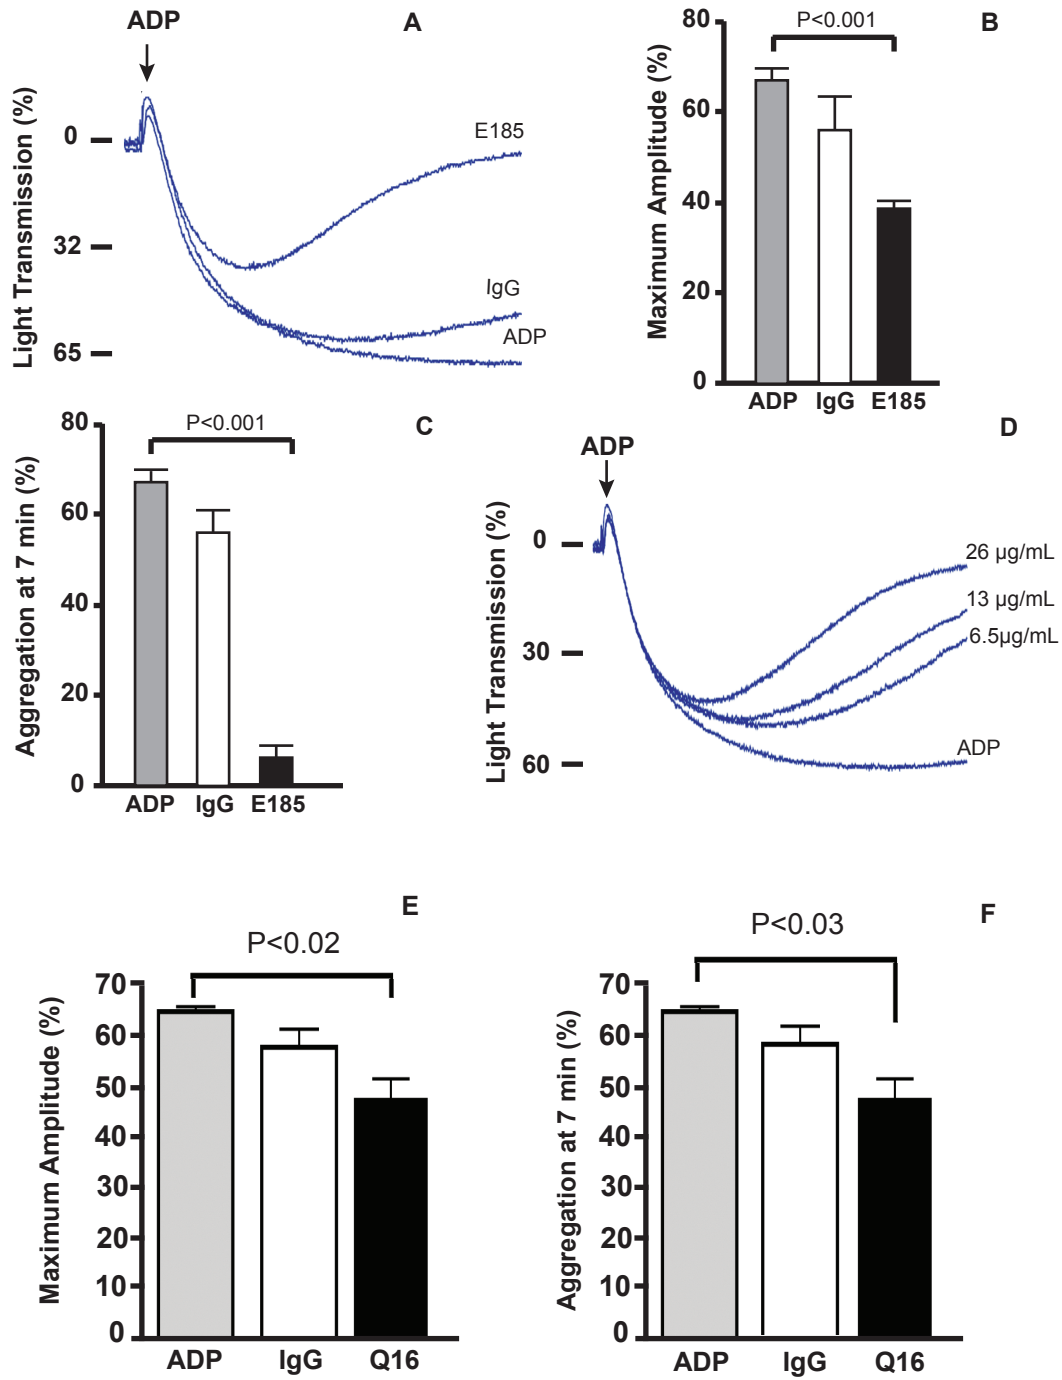

Supplement: MOESM9 [file 9569698]
